# Supplementary material for: Thirty-Day Readmissions in Hospitalized Patients Who Received Bezlotoxumab With Antibacterial Drug Treatment for Clostridium difficile Infection
Source: PubMed Central journal article supplement — Clin Infect Dis. 2017 Aug 11;65(7):1218–21. doi: 10.1093/cid/cix523 (PMC5848255; doi:10.1093/cid/cix523), 2017-08-11
Supplement: cix523_suppl_bezlo_30-day_readmission_supplementary_appendix.pdf [file cix523_suppl_bezlo_30-day_readmission_supplementary_appendix.pdf]

## Supplementary Appendix

Slightly more than half of hospitalized participants were female (54.5%) and were 65 years or older (57.7%). About a quarter of participants had at least one episode of CDI in the prior 6 months (24.0%), 29.1% of participants were immunocompromised, 22.8% had severe CDI, and 22.3% of the participants with a pathogen isolated from a baseline stool sample had infection due to the 027 strain (Table).

**Supplementary Table.** Baseline Demographics and Clinical Characteristics of Hospitalized Participants in the MODIFY1 & II Trials, mITT population

|                                               | Bezlotoxumab<br>(N=530) | Placebo<br>(N=520) | Total<br>(N=1050) |
|-----------------------------------------------|-------------------------|--------------------|-------------------|
| Number of patients (%)                        |                         |                    |                   |
| Subject characteristics                       |                         |                    |                   |
| Female                                        | 285/530 (53.8)          | 287/520 (55.2)     | 572/1050 (54.5)   |
| ≥65 years of age                              | 298/530 (56.2)          | 308/520 (59.2)     | 606/1050 (57.7)   |
| ≥1 CDI episodes in past 6 months <sup>*</sup> | 127/522 (25.4)          | 122/514 (23.7)     | 855/1036 (82.5)   |
| Immunocompromised <sup>†</sup>                | 138/530 (26.0)          | 117/520 (22.5)     | 155/1050 (14.8)   |
| Severe CDI (Zar score ≥2) <sup>**‡</sup>      | 113/507 (22.3)          | 116/497 (23.3)     | 229/1004 (22.8)   |
| 027 strain <sup>§</sup>                       | 67/327 (20.5)           | 81/337 (24.0)      | 148/664 (22.3)    |

<sup>\*</sup>Denominator includes patients with available data

<sup>†</sup>Defined on the basis of a subject's medical history or use of immunosuppressive therapy

<sup>‡</sup>Zar score ≥2 based on the following: (1) age >60 years old (1 point); (2) body temperature >38.3°C (>100°F) (1 point); (3) albumin level <2.5 mg/dL (1 point); (4) peripheral white blood cell count >15,000 cells/mm<sup>3</sup> within 48 hours (1 point); (5) endoscopic evidence of pseudomembranous colitis (2 points); and (6) treatment in an intensive care unit (2 points)

<sup>§</sup>Denominator is patients in the mITT with a positive culture.

CDI=*Clostridium difficile* infection
